# Supplementary material for: Symptoms of Prenatal Depression Associated with Shorter Telomeres in Female Placenta
Source: MDPI journal article supplement (doi:10.3390/ijms22147458), 2021-07-12
Supplement: s1 [file s1]

**Table S1.** Prevalence of obstetric risk factors and association with telomere characteristics. Number (%) is shown. *p* values were assessed with Pearson or Spearman rho correlation. Information for all the stated variables only available for *n*=107/109 participants.

| Obstetric risk factor                             | Prevalence | Association with mean telomere length              |
|---------------------------------------------------|------------|----------------------------------------------------|
| History of previous mood disorders                | 32 (29.4%) | $r = 0.04$<br>$CI = -0.435, 0.87$<br>$p = 0.50$    |
| Currently prescribed medication for mood disorder | 24 (22%)   | $r = 0.07$<br>$CI = -1.007, 1.55$<br>$p = 0.66$    |
| Placental abnormalities                           | 6 (5.5%)   | $r = -0.02$<br>$CI = 0.217, 4.52$<br>$p = 0.48$    |
| Previous stillbirth                               | 4 (3.7%)   | $r = -0.07$<br>$CI = -2.270, 0.90$<br>$p = 0.39$   |
| Previous macrosomic baby                          | 24 (22%)   | $r = -0.03$<br>$CI = -0.799, 0.646$<br>$p = 0.83$  |
| Illegal drug use                                  | 2 (1.8%)   | $r = 0.02$<br>$CI = -1.592, 1.204$<br>$p = 0.78$   |
| FGR diagnosis                                     | 4 (3.7%)   | $r = 0.05$<br>$CI = -1.142, 2.01$<br>$p = 0.58$    |
| Proteinuria                                       | 14 (12.8%) | $r = 0.08$<br>$CI = -0.559, 1.225$<br>$p = 0.461$  |
| Complications during delivery                     | 14 (12.8%) | $r = -0.03$<br>$CI = -0.287, 0.165$<br>$p = 0.593$ |
| Maternal age at booking > 35 years old            | 29 (26.6%) | $r = 0.13$<br>$CI = -0.214, 0.431$<br>$p = 0.497$  |
| Maternal BMI <19.8                                | 3 (3%)     | $r = 0.06$<br>$CI = -25.89, 26.13$<br>$p = 0.964$  |
| Maternal BMI 19.8-25                              | 27 (24.8%) | $r = -0.19$<br>$CI = -0.520, 0.201$<br>$p = 0.369$ |
| Maternal BMI >25                                  | 79 (72.5%) | $r = -0.21$<br>$CI = -0.139, 0.005$<br>$p = 0.068$ |
| GDM                                               | 0          | N/A                                                |
| PE                                                | 0          | N/A                                                |
| Severe infections                                 | 0          | N/A                                                |

FGR = fetal growth restriction; BMI = body mass index; GDM = Gestational diabetes; PE = Preeclampsia.
